# Supplementary material for: One-Stop Management to Initiate Thrombolytic Treatment on the Computed Tomography Table: Adoption and Results
Source: PubMed Central journal article supplement — J Stroke. 2021 Sep 30;23(3):437–9. doi: 10.5853/jos.2021.00878 (PMC8521254; doi:10.5853/jos.2021.00878), 2021-09-30
Supplement: jos-2021-00878-suppl2.pdf [file jos-2021-00878-suppl2.pdf]

**Supplementary Table 1.** The proportion of patients with DNT ≤20 minutes in the centers before and after the introduction of one-stop management

|             | All patients with DNT ≤20 minutes | DNT ≤20 minutes minutes before reorganization | DNT ≤20 minutes after reorganization |
|-------------|-----------------------------------|-----------------------------------------------|--------------------------------------|
| Center 1, N | 186 (44)                          | 80 (34)                                       | 106 (57)                             |
| Center 2, N | 25 (17)                           | 19 (14)                                       | 6 (38)                               |
| Center 3, N | 31 (34)                           | 26 (32)                                       | 5 (56)                               |
| Center 4, N | 0 (0)                             | 0 (0)                                         | 0 (0)                                |

Values are presented as number (%).  
DNT, door-to-needle time.

**Supplementary Table 2.** Stroke logistics in centers according to place of admission

| Variable           | CT room (n=18) | Emergency department (n=26) | Out-patient office (n=11) |
|--------------------|----------------|-----------------------------|---------------------------|
| DNT (min)          | 22 (18–26)     | 30 (25–35)                  | 30 (24–39)                |
| DNT ≤20 minutes    | 9 (50)         | 2 (8)                       | 1 (9)                     |
| Prenotification    | 18 (100)       | 22 (85)                     | 10 (91)                   |
| No. of transfers   |                |                             |                           |
| None               | 16 (89)        | 0 (0)                       | 0 (0)                     |
| 1                  | 2 (11)         | 14 (54)                     | 5 (45)                    |
| 2                  | 0 (0)          | 12 (46)                     | 6 (55)                    |
| Blood draw         | 14 (78)        | 24 (92)                     | 8 (73)                    |
| Other examinations | 3 (17)         | 15 (58)                     | 2 (18)                    |
| Imaging protocol   |                |                             |                           |
| NCCT               | 4 (22)         | 7 (27)                      | 2 (18)                    |
| NCCT+CTA           | 12 (67)        | 17 (65)                     | 7 (64)                    |
| NCCT+CTA+CTP       | 2 (11)         | 2 (8)                       | 2 (18)                    |
| IVT on CT table    | 16 (89)        | 14 (54)                     | 5 (45)                    |

Values are presented as median (interquartile range) or number (%).

CT, computed tomography; DNT, door-to-needle time; NCCT, noncontrast computed tomography; CTA, computed tomography angiography; CTP, computed tomography perfusion; IVT, intravenous thrombolysis.
